# Supplementary material
Source: PubMed Central journal article supplement (PMC2329718)
Supplement: 0801777105_Supplemental_PDF.pdf [file 0801777105_Supplemental_PDF.pdf]

# Supporting Information

Wang et al. 10.1073/pnas.0801777105

## Main Experiment

### Materials and Methods

**Mouse Urine and Blood Collection.** Urine and blood collections were carried out at the same time throughout the study, i.e., between 0900 hours and 1100 hours, to avoid diurnal variations in urinary metabolites. At least 20  $\mu\text{l}$  of urine were directly collected in a Petri dish by gently rubbing the abdomen of the mouse and transferred into small tubes kept on dry ice and stored at  $-40^{\circ}\text{C}$  pending NMR analysis. Blood was collected from the tail of the mouse after cutting off its tip with scissors. At each time point,  $\approx 40$   $\mu\text{l}$  of tail blood was collected into hematocrit tubes (Sodium [Na] heparin) and centrifuged at  $4,000 \times g$  for 4 min, using a model 1–15 centrifuge from Sigma (Osterode am Harz, Germany). The plasma was transferred into small Eppendorf tubes and stored at  $-40^{\circ}\text{C}$  pending NMR analysis.

After the final urine and plasma collection time point (day 33 postinfection), mice were killed, and the liver and kidney were removed and transferred in small Eppendorf tubes containing 10% formalin. Sections were cut and stained with hematoxylin/eosin before examination by light microscopy.

Five microliters of mid-stream blood was also collected into an Eppendorf tube containing 20  $\mu\text{l}$  of sodium-citrate from infected mice for determination of parasitemia. After thoroughly mixing, 5  $\mu\text{l}$  of the homogenate was placed on a microscope slide and covered with a square-shaped cover slide ( $15 \times 15$  mm). The parasites were counted under a microscope at  $\times 200$  magnification using a counting grid. Based on the size of the grid, the thickness of the blood film and the dilution factor (5-fold), the parasitemia could be calculated.

**$^1\text{H}$  NMR Spectroscopy.** Urine samples were prepared by mixing 20  $\mu\text{l}$  of urine with 30  $\mu\text{l}$  of phosphate buffer (pH 7.4) containing 50%  $\text{D}_2\text{O}$  as a field frequency lock and 0.05% sodium 3-(trimethylsilyl) propionate-2,2,3,3-d<sub>4</sub> (TSP) as a chemical shift reference ( $\delta$  0.0). Plasma samples were prepared by adding 30  $\mu\text{l}$  of saline containing 50%  $\text{D}_2\text{O}$  in an Eppendorf tube containing  $\approx 20$   $\mu\text{l}$  of plasma. Samples were then transferred into 1.7-mm microNMR tubes using a microsyringe. All  $^1\text{H}$  NMR spectra were recorded on a Bruker Avance 600 NMR spectrometer operating at 600.13 MHz.  $^1\text{H}$  NMR spectra of both urine and plasma were acquired with a Bruker 5-mm triple resonance probe with inverse detection employing the pulse sequence [RD-90 $^{\circ}$ - $t_1$ -90 $^{\circ}$ - $t_m$ -90 $^{\circ}$ -ACQ].  $t_1$  was set to 3  $\mu\text{s}$  and mixing time,  $t_m$ , was 150 ms. Water suppression was achieved via irradiation of the water peak during the recycle delay (RD = 2 s) and mixing time. The 90 $^{\circ}$  pulse length was adjusted to  $\approx 10$   $\mu\text{s}$ . A total of 256 transients were collected into 32,000 data points for each spectrum with a spectral width of 20 ppm. For plasma, an additional water-suppressed Carr-Purcell-Meiboom-Gill (CPMG) (1) spectrum was acquired for each sample using the pulse sequence [RD-90 $^{\circ}$ -( $\tau$ -180 $^{\circ}$ - $\tau$ ) $_n$ -ACQ]. This acts as a  $t_2$  relaxation filter to suppress signals from macromolecules and other molecules with constrained molecular motions. A total spin-spin relaxation delay ( $2n\tau$ ) of 160 ms was used for all samples and water signal irradiation was applied during the relaxation delay. All free induction decays (FIDs) were multiplied by an exponential function equivalent to a 0.3 Hz line-broadening factor before Fourier transformation.

Metabolites were assigned from the literature (2) and from 2-dimensional (2D) NMR spectra including  $^1\text{H}$ - $^1\text{H}$  COSY, TOCSY, and  $^1\text{H}$  J-resolved NMR spectra acquired for a selec-

tion of plasma sample using parameters described in previous studies (3).

### Results

**Histology and Parasitaemia.** From the main experimental cohort of mice, the numbers of trypanosomes were estimated under a microscope at five different time points postinfection (days 7, 14, 21, 28, and 33). On average, at days 7 and 33 postinfection, 115,300 and 164,900 trypanosomes were estimated per  $\mu\text{l}$  of blood from infected mice, respectively. There was a significant decrease in parasitemia from day 7 to day 14 postinfection (average: 41,300 parasites/ $\mu\text{l}$  blood), followed by a steady increase thereafter. However, we observed significant variation of parasitemia from one animal to another, and between different time points.

No significant differences in bodyweight were observed between the control and infected mice. One mouse died before day 28 postinfection, and 3 died before the end of the experiment (day 33 postinfection).

On termination, control mice showed no abnormalities in cellular architecture in either the liver or kidney. All infected animals manifested marked hepatic extramedullary hemopoiesis and renal interstitial nephritis (Fig. S1).

**Metabolic Changes Associated with *T. brucei brucei* Infection.** O-PLS-DA was carried out to characterize the metabolic features of *T. brucei brucei* infection. The key metabolic changes are summarized in Tables 1 (urine) and 2 (plasma) in the main text. An example coefficient plot obtained from the comparison of NMR spectra of preinfection and day 14 postinfection is shown in Fig. S24. The O-PLS-DA coefficients plot can be considered as a difference spectrum between the samples at different time points. The direction of the signals corresponds to the relative concentrations of metabolites in one class (preinfection) compared with the other class (postinfection). The colors of the signal in the O-PLS-DA coefficient plot are associated with the significance of metabolites in separating the classes based on the correlation matrix, and the values can be obtained from the color scale on the right-hand side of the plot. Red denotes a more significant contribution to the separation between classes than blue. A selected O-PLS-DA coefficient plot comparing plasma from the control and infected group at day 14 is shown in Fig. S2B.

**NMR Spectra of Plasma.** Plasma metabolic profiles showed alterations already 1 day postinfection. Elevated levels of lactate, alanine, branched chain amino acids, and acetylglycoprotein fragments were noted.

A systematic change in concentrations of valine and alanine were observed since the ratio of valine to alanine may report on the status of increased ketogenesis in the infected mice. Therefore, the valine to alanine ratio was measured by integration of the valine and alanine resonances in the plasma spectra and plotted in Fig. S3. The line plot showed a significant and enduring decrease in this ratio occurred from day 7 postinfection onwards.

**NMR Spectra of Urine.** Urinary concentrations of several microbial co-metabolites (e.g., hippurate) indicated a change of microbial activity.

**Metabolic Changes over Time.** Significant metabolic changes over time, associated with *T. brucei brucei* infection were detected in



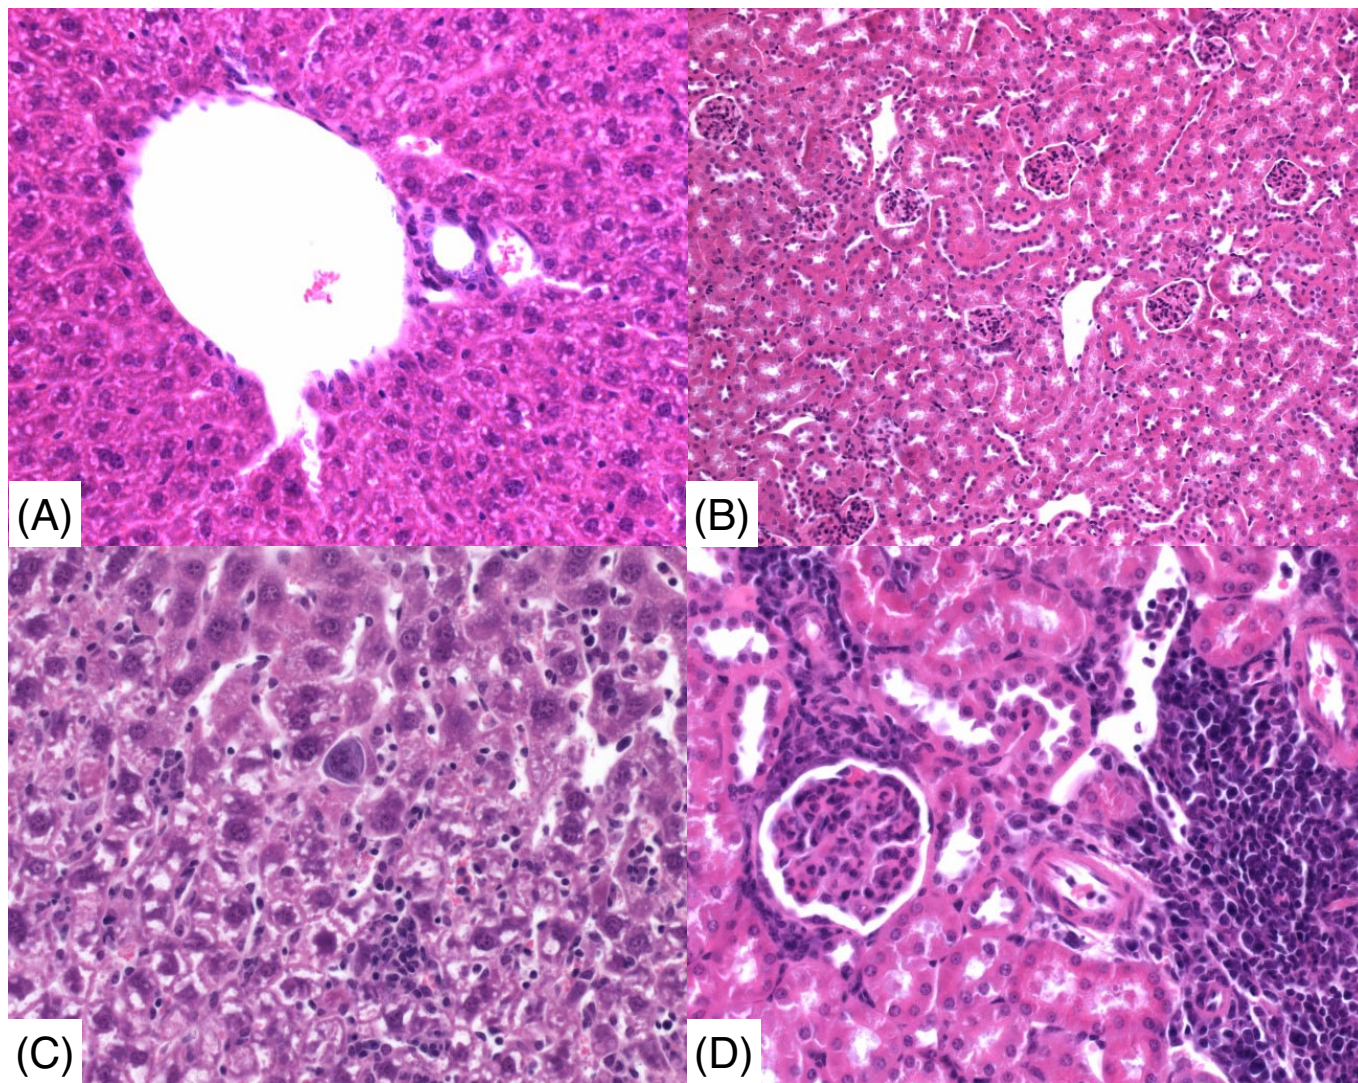

**Fig. S1.** Sections of liver (A) and kidney (B) from uninfected control mice. Histopathological alterations were seen in *T. brucei brucei*-infected mice both in the liver, i.e., hemopoiesis (C), and kidney, i.e., interstitial nephritis (D).



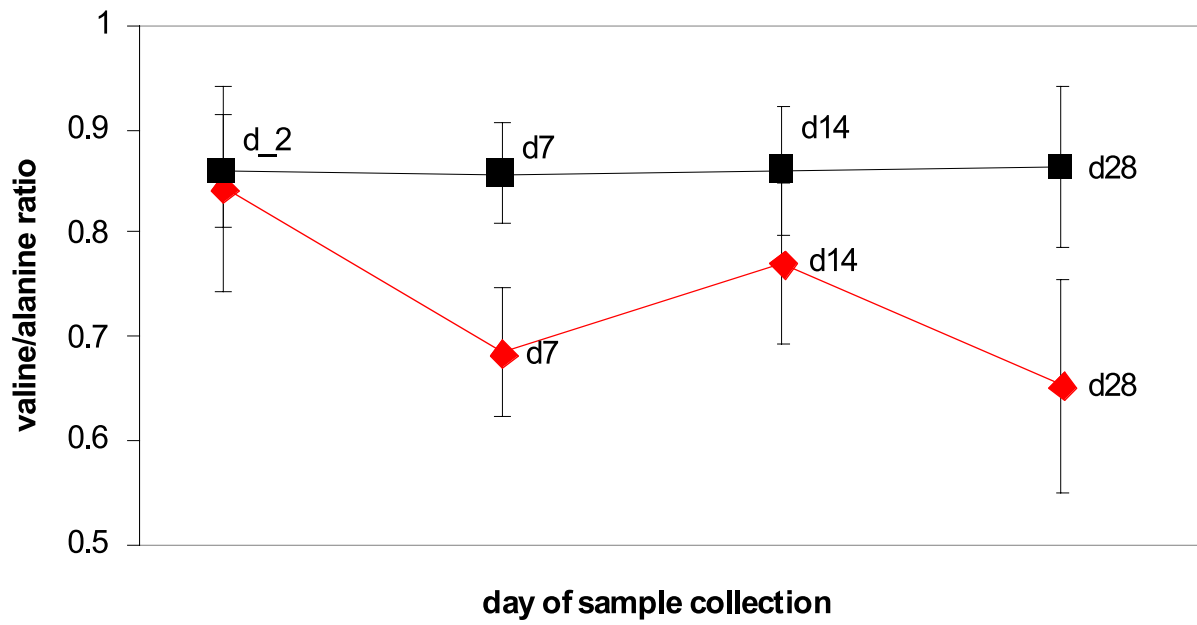

Fig. S3. Valine to alanine ratio for the control (black box) and *T. brucei brucei*-infected (red diamond) groups of mice calculated from the 1D CPMG NMR spectra of plasma.

**Table S1. Number of mice with parasitemia/number of mice examined at three different time points**

|                                                                                                                    | Days after injection of brain |     |     |
|--------------------------------------------------------------------------------------------------------------------|-------------------------------|-----|-----|
|                                                                                                                    | 4                             | 7   | 14  |
| Group A (injected with brain from mice in group 1 that had been infected with <i>T. brucei brucei</i> for 7 days)  | 4/8                           | 8/8 | 7/8 |
| Group B (injected with brain from mice in group 2 that had been infected with <i>T. brucei brucei</i> for 14 days) | 6/7                           | 7/7 | 5/7 |
| Group C (injected with brain from mice in group 3 that had been infected with <i>T. brucei brucei</i> for 21 days) | 5/5                           | 4/5 | 5/5 |
